# A new method to determine the scale range of environmental damage caused by water pollution accidents

Gaimei Guo <sup>a,b,\*</sup> and Runbin Duan<sup>a</sup>

<sup>a</sup> College of Environmental Science and Engineering, Taiyuan University of Technology, Taiyuan 030024, China

<sup>b</sup> Shanxi Academy for Environmental Planning, Taiyuan 030024, China

\*Corresponding author. E-mail: 360507983@qq.com

 GG, 0000-0002-6946-7894

## ABSTRACT

Recently, water pollution accidents have happened frequently and have caused serious environmental damage. The purpose of this study was to propose a new method to determine the scale range of environmental damage in water pollution events. In this study, taking Fen River in Shanxi Province as an example, a computer simulation system was used to simulate the diffusion and migration process of phenol at different concentrations, so as to determine the curve series of the scale range of environmental damage caused by the simulated water pollution event. At the same time, taking the incident of water pollution caused by phenol leakage in Jingle County as an example, the actual scale range of environmental damage was compared with the simulated scale range, so as to determine the error of the scale range of environmental damage. The results showed that the maximum error of the curve series of the scale range of environmental damage was 22.4%, and the minimum error was 7.5%, which indicated that the error of the scale range of environmental damage was small, and proved that this method of quantitatively determining the scale range of environmental damage had certain scientific nature.

**Key words:** computer simulation, environmental damage, scale range, validation, water pollution accidents

## HIGHLIGHTS

- Proposed a new method to determine the scale range of water environmental damage.
- Obtained the curve series of the scale range of water environmental damage.
- The actual scale of environmental damage was compared with the simulated scale.
- The error of the scale range of water environmental damage was small (7.5%–22.4%).
- The method of determining the scale range of environmental damage was scientific.

## INTRODUCTION

At present, accidental pollution events such as process leaks, transport accidents, collisions and pipeline leaks occur frequently in many countries (Pulido-Velazquez & Ward 2017) and China (Tang *et al.* 2014). Pollution accidents can cause serious ecological and environmental damage to surrounding areas leading to imbalance of the regional ecological system (Peng *et al.* 2013; Rui *et al.* 2015; Belayutham *et al.* 2016). In various pollution incidents, accidental water pollution incidents have occurred more and more frequently (He *et al.* 2011; Qu *et al.* 2016; Yang *et al.* 2017). Over the past decade, the Ministry of Environmental Protection, China, responded directly to 765 water pollution accidents, corresponding to 58% of the total number of environmental emergencies (Ministry of Environmental Protection 2015–2019). In water pollution events, the effects of water pollutants were mainly manifested in the acute poisoning effect on animals and plants, the chronic poisoning effect and the biological amplification effect in the biological chain (Wang *et al.* 2008; Li *et al.* 2009; Liu *et al.* 2013).

In recent years, determining the scale range of environmental damage caused by water pollution events has attracted worldwide attention (Tao *et al.* 2013; Yang *et al.* 2015). Factors affecting the scale range of environmental damage in water pollution events include the concentration of pollutants, the nature of pollutants, the time of pollution, and the depth, water level, velocity and discharge of the river. Determining the scale range of environmental damage of water pollution events should be based on the actual situation, and should not be generalized. At present, most studies focus on the qualitative

This is an Open Access article distributed under the terms of the Creative Commons Attribution Licence (CC BY 4.0), which permits copying, adaptation and redistribution, provided the original work is properly cited (<http://creativecommons.org/licenses/by/4.0/>).

discussion of how to determine the scale range of environmental damage caused by water pollution events. For example, [Ding et al. \(2017\)](#) proved that when the scale range of environmental damage of water pollution events was too large, the large local influence could be ignored. [Dong et al. \(2017\)](#) proposed that the scale range of environmental damage of water pollution events was too small, and some sensitive factors might be missed. [Ani et al. \(2012\)](#) pointed out the influence of the river velocity on the scale range of environmental damage caused by water pollution events. [Ren et al. \(2017\)](#) explained the influence of the concentration and nature of pollutants on the scale range of environmental damage caused by water pollution events. However, these studies still had one major limitation due to the lack of discussion of how to quantitatively determine the scale range of environmental damage in water pollution events. Therefore, the objectives of this study were to develop a new method to quantitatively determine the scale range of environmental damage in water pollution events, and to verify the scientific nature of this method through an actual case.

## METHODOLOGY AND MATERIALS

### Study area

Fen River is the main river in Shanxi Province of China. It flows from the north to the south of Shanxi Province and finally reaches the Yellow River. The Yellow River is the main source of drinking water in Shanxi Province. The starting point of Fen River in Shanxi Province was taken as the starting point of the study section, and the entrance to the Yellow River was taken as the end point of the study section. Taking the monitoring points of Fen River in Shanxi Province as the research points, there were nine distances from each research point (including the starting point of the research section) to the end point of the research section. These nine distance segments were taken as the research lengths. The research length and research section of Fen River are shown in [Table 1](#).

### The phenol leakage event

At 16:56 pm on May 22, 2016, on provincial highway S313, a tanker carrying 24.35 tons of phenol from Kelan to Shijiazhuang, Hebei Province, overturned in a traffic accident on the west road of Yaohui Village in Jingle County in Shanxi. As a result, the phenol leaked and about five tons of it flowed into Fen River along the drainage channel on the north side of the road. The phenol leakage event was located in Jingle County, Shanxi Province, China. The study area is located at the accident site in the Liudu Bridge section.

### Environmental damage model of water pollution accidents

In order to study the influence of the phenol leakage event on the downstream and banks of Fen River, the Environmental Damage Model of Water Pollution Accidents was used to simulate the pollutant concentration. This model perfectly combines the most advanced calculation engine of hydrodynamic–water-quality numerical simulation Delft3D-FLOW in the world with the standard ‘Map World’ of the China Bureau of Surveying and Mapping, and it can analyze and predict accidental water pollution events by drawing grids, setting parameters, calculating results and rendering.

**Table 1** | The research length and research section of Fen River

| Name of research section | The starting point of the research section | The end point of the research section | Research length <i>R</i> (km) |
|--------------------------|--------------------------------------------|---------------------------------------|-------------------------------|
| I                        | 1-the starting point of Fen River          | 10                                    | 710                           |
| II                       | 2-Hexi Village                             | 10                                    | 608                           |
| III                      | 3-Thunder Temple                           | 10                                    | 512                           |
| IV                       | 4-Fen River Reservoir outlet               | 10                                    | 409                           |
| V                        | 5-Shanglan                                 | 10                                    | 368                           |
| VI                       | 6-Wenna club                               | 10                                    | 249                           |
| VII                      | 7-Xiaodian Bridge                          | 10                                    | 187                           |
| VIII                     | 8-South of Wangzhuang Bridge               | 10                                    | 109                           |
| IX                       | 9-Shangpingwang                            | 10                                    | 52                            |

## Mesh generation

Mesh generation is a key step in realizing the information attributes of all elements in the watershed to be illustrated by the mathematical model (Yang *et al.* 2015). The grid generalization model employs a 2D model for the large-scale complex boundary conditions of rivers, and a suitable grid density is reached by repeating computations until a satisfactory independent grid is found.

Natural rivers have irregular three-dimensional shapes, which make the geometric and boundary conditions difficult to characterize. The system can transform irregular geometries of a physical domain into simple and regular geometries of a computational domain, which is automatically generated with the help of GIS spatial analysis modules.

## Parameter set

The names and values of parameters are shown in Table 2. A flowchart of the study is shown in Figure 1.

## RESULTS AND DISCUSSION

### Simulation results

The computer simulation system Environmental Damage Model of Water Pollution Accidents was used to simulate the migration process of phenol with different concentrations in each research length of Fen River, in order to determine the simulated concentration of phenol ( $C_1$ ) at the starting point of each research length when the simulated concentration of phenol ( $C_2$ ) at the end point of the research section reached about the safe concentration  $C_s$  (0.20 mg/L). Then, if the simulated concentration of phenol at the starting point of each research length was  $C_1$ , the corresponding research length was the scale range of environmental damage. The simulated concentration of phenol at the starting point of the research section and the corresponding simulated concentration at the end of the research section are shown in Table 3.

According to Table 3, in study section I, when the simulated concentration of phenol at the beginning of the study section was 390 mg/L, the simulated concentration of phenol at the end of the study section was 0.19 mg/L ( $\approx 0.20$  mg/L). In study section II, when the simulated concentration of phenol at the beginning of the study section was 330 mg/L, the simulated concentration of phenol at the end of the study section was 0.22 mg/L ( $\approx 0.20$  mg/L). In study section III, when the simulated concentration of phenol at the beginning of the study section was 260 mg/L, the simulated concentration of phenol at the end of the study section was 0.21 mg/L ( $\approx 0.20$  mg/L). In study section IV, when the simulated concentration of phenol at the beginning of the study section was 210 mg/L, the simulated concentration of phenol at the end of the study section was 0.19 mg/L ( $\approx 0.20$  mg/L). In study section V, when the simulated concentration of phenol at the beginning of the study section was 180 mg/L, the simulated concentration of phenol at the end of the study section was 0.23 mg/L ( $\approx 0.20$  mg/L). In study section VI, when the simulated concentration of phenol at the beginning of the study section was 150 mg/L, the simulated concentration of phenol at the end of the study section was 0.17 mg/L ( $\approx 0.20$  mg/L). In study section VII, when the simulated concentration of phenol at the beginning of the study section was 120 mg/L, the simulated concentration of phenol at the end of the study section was 0.24 mg/L ( $\approx 0.20$  mg/L). In study section VIII, when the simulated concentration of phenol at the beginning of the study section was 80 mg/L, the simulated concentration of phenol at the end of the study section was 0.18 mg/L ( $\approx 0.20$  mg/L). In study section IX, when the simulated concentration of phenol at the beginning of the study section was 60 mg/L, the simulated concentration of phenol at the end of the study section was 0.15 mg/L ( $\approx 0.20$  mg/L).

**Table 2** | The names and values of parameters

| Name                              | Value                     |
|-----------------------------------|---------------------------|
| River flow                        | $7.7 \text{ m}^3$         |
| Pollutant leakage time            | 2 h                       |
| Diffusion simulation time         | 62 h                      |
| Pollutant attenuation coefficient | $0.0006 \text{ day}^{-1}$ |
| Safe concentration of pollutant   | 0.20 mg/L                 |

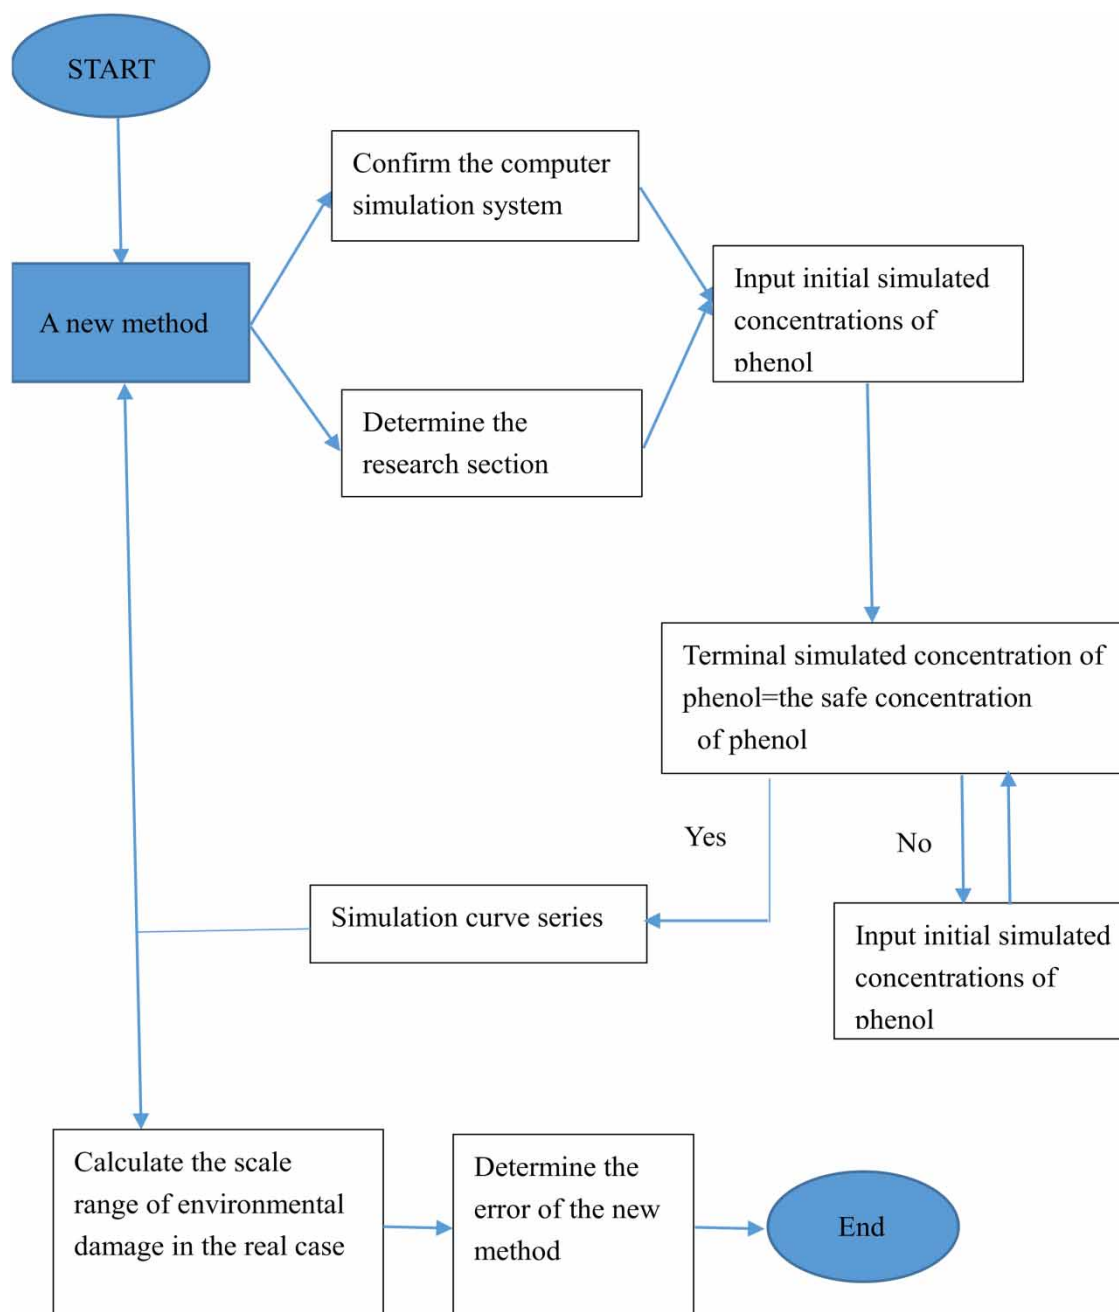

**Figure 1** | A flowchart of the study.

Taking the study section as IX, when the simulated concentration of phenol at the starting point of the study section was 60 mg/L, [Figures 2–5](#) show the simulation diagram of phenol diffusion at 6, 10, 14 and 18 h respectively. As can be seen from [Figures 2–5](#), the pollutant moved in the form of a ‘pollutant band’ from upstream to downstream. The darker the color is, the higher the concentration of phenol is, and vice versa. Red represents the most polluted area, and the concentration of phenol represented by orange, yellow and green decreases in turn. Blue indicates that the concentration of phenol has fallen below the surface water quality standard.

As seen in [Figures 2–5](#), the color of the ‘pollutant band’ gradually changes from red to blue, which indicates that the pollutant moved from upstream to downstream with an increasing pollution area but a decreasing phenol concentration. The expansion of the pollution area was mainly caused by transverse and longitudinal diffusions and was affected by their

**Table 3** | Simulated concentration of phenol in each research section

| Name of research section | Simulated concentration of phenol at the starting point of the research section $C_1$ (mg/L) | Simulated concentration of phenol at the end point of the research section $C_2$ (mg/L) | Safe concentration of phenol $C_s$ (mg/L) |
|--------------------------|----------------------------------------------------------------------------------------------|-----------------------------------------------------------------------------------------|-------------------------------------------|
| I                        | 500                                                                                          | 3.67                                                                                    | 0.20                                      |
|                          | 450                                                                                          | 1.42                                                                                    | 0.20                                      |
|                          | 400                                                                                          | 0.35                                                                                    | 0.20                                      |
|                          | 350                                                                                          | 0.04                                                                                    | 0.20                                      |
|                          | 360                                                                                          | 0.07                                                                                    | 0.20                                      |
|                          | 380                                                                                          | 0.15                                                                                    | 0.20                                      |
|                          | 390                                                                                          | 0.19                                                                                    | 0.20                                      |
| II                       | 380                                                                                          | 1.96                                                                                    | 0.20                                      |
|                          | 360                                                                                          | 1.04                                                                                    | 0.20                                      |
|                          | 350                                                                                          | 0.70                                                                                    | 0.20                                      |
|                          | 340                                                                                          | 0.51                                                                                    | 0.20                                      |
|                          | 330                                                                                          | 0.22                                                                                    | 0.20                                      |
| III                      | 320                                                                                          | 1.73                                                                                    | 0.20                                      |
|                          | 300                                                                                          | 0.78                                                                                    | 0.20                                      |
|                          | 280                                                                                          | 0.46                                                                                    | 0.20                                      |
|                          | 270                                                                                          | 0.32                                                                                    | 0.20                                      |
|                          | 260                                                                                          | 0.21                                                                                    | 0.20                                      |
| IV                       | 250                                                                                          | 2.26                                                                                    | 0.20                                      |
|                          | 230                                                                                          | 1.29                                                                                    | 0.20                                      |
|                          | 220                                                                                          | 0.54                                                                                    | 0.20                                      |
|                          | 210                                                                                          | 0.19                                                                                    | 0.20                                      |
| V                        | 200                                                                                          | 1.65                                                                                    | 0.20                                      |
|                          | 190                                                                                          | 0.67                                                                                    | 0.20                                      |
|                          | 180                                                                                          | 0.23                                                                                    | 0.20                                      |
| VI                       | 170                                                                                          | 1.80                                                                                    | 0.20                                      |
|                          | 160                                                                                          | 0.79                                                                                    | 0.20                                      |
|                          | 150                                                                                          | 0.17                                                                                    | 0.20                                      |
| VII                      | 140                                                                                          | 1.91                                                                                    | 0.20                                      |
|                          | 130                                                                                          | 0.88                                                                                    | 0.20                                      |
|                          | 120                                                                                          | 0.24                                                                                    | 0.20                                      |
| VIII                     | 100                                                                                          | 1.49                                                                                    | 0.20                                      |
|                          | 90                                                                                           | 0.63                                                                                    | 0.20                                      |
|                          | 80                                                                                           | 0.18                                                                                    | 0.20                                      |
| IX                       | 70                                                                                           | 1.84                                                                                    | 0.20                                      |
|                          | 65                                                                                           | 0.77                                                                                    | 0.20                                      |
|                          | 60                                                                                           | 0.15                                                                                    | 0.20                                      |

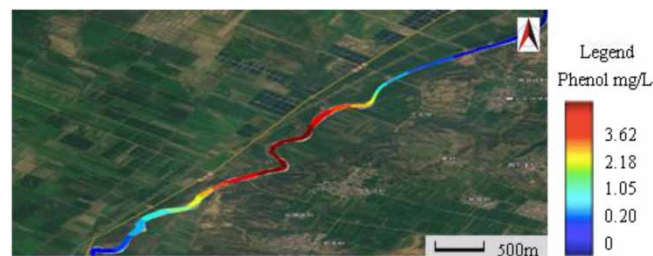**Figure 2** | Diffusion status 6 h after the phenol leakage event.

speeds. Furthermore, the reasons for the decrease of phenol concentration were the transportation and degradation of the pollutant and the self-purification of the river. In addition, the color of the 'pollutant band' gradually reddens from the outside to the inside, indicating that the area with the highest concentration of phenol was near the center of the 'pollutant band'. The

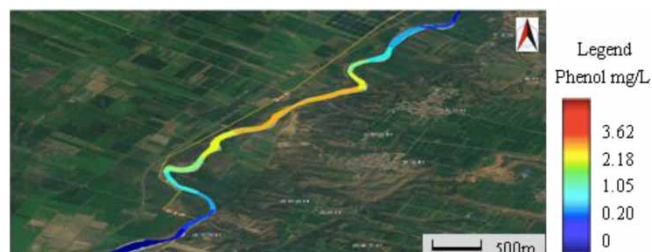

**Figure 3** | Diffusion status 10 h after the phenol leakage event.

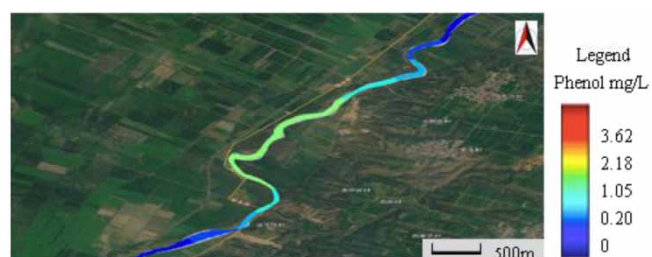

**Figure 4** | Diffusion status 14 h after the phenol leakage event.

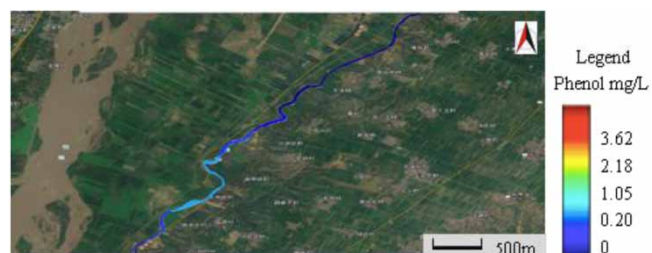

**Figure 5** | Diffusion status 18 h after the phenol leakage event.

pollutant ultimately remained in the river so that the water quality of the relevant area needed to be monitored until the river water quality returned to normal. Additionally, the pollutant had a certain degree of impact on the river ecosystem and the health of the residents.

### Determination of the scale range of environmental damage

A series of different phenol concentrations were taken, which were required to be less than the corresponding simulated concentration of phenol at the beginning of each study section ( $C_a$ ) when the simulated concentration of phenol at the end of the study section ( $C_b$ ) was about the safe concentration (when the concentration of phenol at the beginning of each study section was greater than  $C_a$ , the scale range of environmental damage was larger than the corresponding study length  $L$ ), and the diffusion and migration process of the phenol was simulated in the corresponding study length in order to determine the corresponding migration length when the phenol concentration ( $C_b$ ) was reduced to about the safe concentration, and this migration length was the scale range (Table 4).

According to the data in Table 4, the curve series of the scale range of environmental damage can be obtained and there are nine curves (Figure 6). In Figure 6, the coordinate  $x$  of the curve series is the initial simulated concentration of phenol  $C_a$  (mg/L) at the starting point of each study section. The coordinate  $y$  is the scale range of environmental damage  $L$  (km) corresponding to  $C_a$  at the starting point of each study section. The coordinate  $z$  represents the distance between the starting point of each study section and the end point of the study section, namely the study length  $R$  (km).

**Table 4** | Simulated concentration of phenol and the corresponding scale range

| The starting point of the study section | The initial simulated concentration of phenol $C_a$ (mg/L) | Phenol concentration (about the safe concentration) $C_b$ (mg/L) | The corresponding scale range $L$ (km) |
|-----------------------------------------|------------------------------------------------------------|------------------------------------------------------------------|----------------------------------------|
| 1-the starting point of Fen River       | 390                                                        | 0.19                                                             | 710                                    |
|                                         | 345                                                        | 0.17                                                             | 664                                    |
|                                         | 300                                                        | 0.21                                                             | 605                                    |
|                                         | 250                                                        | 0.23                                                             | 542                                    |
|                                         | 200                                                        | 0.21                                                             | 486                                    |
|                                         | 170                                                        | 0.18                                                             | 428                                    |
|                                         | 130                                                        | 0.22                                                             | 351                                    |
|                                         | 100                                                        | 0.24                                                             | 288                                    |
|                                         | 60                                                         | 0.23                                                             | 205                                    |
|                                         | 30                                                         | 0.18                                                             | 116                                    |
|                                         | 10                                                         | 0.25                                                             | 47                                     |
| 2-Hexi Village                          | 330                                                        | 0.22                                                             | 643                                    |
|                                         | 290                                                        | 0.22                                                             | 591                                    |
|                                         | 250                                                        | 0.24                                                             | 525                                    |
|                                         | 210                                                        | 0.25                                                             | 460                                    |
|                                         | 170                                                        | 0.21                                                             | 435                                    |
|                                         | 130                                                        | 0.20                                                             | 373                                    |
|                                         | 90                                                         | 0.18                                                             | 291                                    |
|                                         | 60                                                         | 0.17                                                             | 239                                    |
|                                         | 30                                                         | 0.22                                                             | 148                                    |
|                                         | 10                                                         | 0.23                                                             | 62                                     |
|                                         | 260                                                        | 0.21                                                             | 568                                    |
|                                         | 230                                                        | 0.17                                                             | 489                                    |
|                                         | 200                                                        | 0.22                                                             | 425                                    |
|                                         | 170                                                        | 0.16                                                             | 376                                    |
| 3-Thunder Temple                        | 140                                                        | 0.19                                                             | 303                                    |
|                                         | 110                                                        | 0.23                                                             | 254                                    |
|                                         | 80                                                         | 0.21                                                             | 186                                    |
|                                         | 60                                                         | 0.22                                                             | 107                                    |
|                                         | 30                                                         | 0.18                                                             | 73                                     |
|                                         | 10                                                         | 0.17                                                             | 36                                     |
|                                         | 210                                                        | 0.19                                                             | 497                                    |
|                                         | 180                                                        | 0.22                                                             | 385                                    |
|                                         | 150                                                        | 0.24                                                             | 311                                    |
|                                         | 120                                                        | 0.16                                                             | 252                                    |
| 4-Fen River Reservoir outlet            | 100                                                        | 0.19                                                             | 197                                    |
|                                         | 80                                                         | 0.21                                                             | 134                                    |
|                                         | 60                                                         | 0.25                                                             | 109                                    |
|                                         | 40                                                         | 0.17                                                             | 77                                     |
|                                         | 20                                                         | 0.16                                                             | 51                                     |
|                                         | 10                                                         | 0.22                                                             | 29                                     |
|                                         | 180                                                        | 0.23                                                             | 426                                    |
|                                         | 160                                                        | 0.16                                                             | 360                                    |
|                                         | 140                                                        | 0.19                                                             | 319                                    |
|                                         | 120                                                        | 0.24                                                             | 258                                    |
| 5-Shanglan                              | 100                                                        | 0.22                                                             | 203                                    |
|                                         | 80                                                         | 0.20                                                             | 177                                    |
|                                         | 60                                                         | 0.17                                                             | 125                                    |
|                                         | 40                                                         | 0.19                                                             | 86                                     |
|                                         | 20                                                         | 0.16                                                             | 57                                     |
|                                         | 10                                                         | 0.19                                                             | 31                                     |
|                                         | 150                                                        | 0.17                                                             | 355                                    |
|                                         | 130                                                        | 0.17                                                             | 302                                    |
|                                         | 110                                                        | 0.19                                                             | 269                                    |
|                                         | 90                                                         | 0.21                                                             | 234                                    |

(Continued.)



**Table 4** | Continued

| The starting point of the study section | The initial simulated concentration of phenol $C_a$ (mg/L) | Phenol concentration (about the safe concentration) $C_b$ (mg/L) | The corresponding scale range $L$ (km) |
|-----------------------------------------|------------------------------------------------------------|------------------------------------------------------------------|----------------------------------------|
| 6-Wenna club                            | 70                                                         | 0.24                                                             | 208                                    |
|                                         | 50                                                         | 0.18                                                             | 183                                    |
|                                         | 30                                                         | 0.16                                                             | 116                                    |
|                                         | 20                                                         | 0.23                                                             | 74                                     |
|                                         | 10                                                         | 0.18                                                             | 43                                     |
|                                         | 120                                                        | 0.24                                                             | 284                                    |
|                                         | 100                                                        | 0.22                                                             | 247                                    |
|                                         | 80                                                         | 0.25                                                             | 211                                    |
|                                         | 70                                                         | 0.21                                                             | 183                                    |
| 7-Xiaodian Bridge                       | 60                                                         | 0.20                                                             | 164                                    |
|                                         | 50                                                         | 0.24                                                             | 135                                    |
|                                         | 40                                                         | 0.18                                                             | 111                                    |
|                                         | 30                                                         | 0.18                                                             | 87                                     |
|                                         | 20                                                         | 0.16                                                             | 56                                     |
|                                         | 10                                                         | 0.19                                                             | 33                                     |
|                                         | 80                                                         | 0.18                                                             | 213                                    |
|                                         | 70                                                         | 0.21                                                             | 186                                    |
|                                         | 60                                                         | 0.21                                                             | 155                                    |
| 8-South of Wangzhuang Bridge            | 50                                                         | 0.24                                                             | 132                                    |
|                                         | 40                                                         | 0.22                                                             | 116                                    |
|                                         | 30                                                         | 0.18                                                             | 88                                     |
|                                         | 20                                                         | 0.19                                                             | 57                                     |
|                                         | 10                                                         | 0.22                                                             | 31                                     |
|                                         | 5                                                          | 0.22                                                             | 17                                     |
|                                         | 60                                                         | 0.15                                                             | 142                                    |
|                                         | 50                                                         | 0.18                                                             | 126                                    |
|                                         | 40                                                         | 0.16                                                             | 101                                    |
| 9-Shangpingwang                         | 35                                                         | 0.20                                                             | 85                                     |
|                                         | 30                                                         | 0.22                                                             | 69                                     |
|                                         | 25                                                         | 0.19                                                             | 56                                     |
|                                         | 20                                                         | 0.21                                                             | 42                                     |
|                                         | 15                                                         | 0.23                                                             | 30                                     |
|                                         | 10                                                         | 0.22                                                             | 22                                     |
|                                         | 5                                                          | 0.24                                                             | 13                                     |

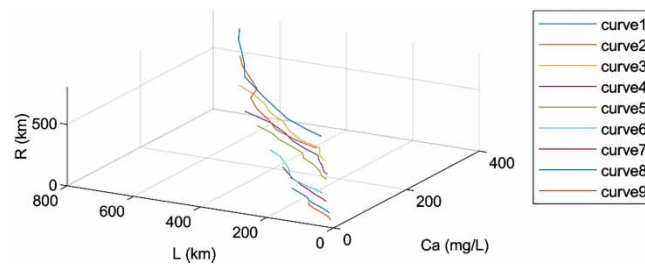**Figure 6** | The curve series of the scale range of environmental damage.

As can be seen from Figure 6, the longer the study section was, the larger the initial simulated concentration of phenol at the starting point of the study section was, and the longer the scale range of environmental damage was. According to the curve series, the scale range of environmental damage corresponding to the diffusion and migration of phenol with any concentration in this coordinate system could be obtained. However, the scale of the environmental damage in Figure 6 was



obtained under the simulated condition. Next, the actual case would be used to verify the scientificity of this quantitative method to determine the scale range of environmental damage.

### The phenol pollution event

Taking the phenol pollution event in Jingle County as an example, the scale range of phenol migration was obtained according to the monitoring data of phenol concentration in the event. The maximum concentration of phenol at each monitoring point was the location of the pollution cluster. When the concentration of phenol at the monitoring point was reduced from the maximum concentration to about the safe concentration (0.20 mg/L), the corresponding migration length of phenol was the scale range of environmental damage.

The monitoring data of phenol concentration in the event are shown in Table 5. The monitoring data were provided by Xinzhou Municipal Environmental Protection Bureau.

### Verification of the scale range of environmental damage

According to the monitoring data of phenol concentration in the event in Jingle County, point  $A_x$  ( $x = 1, 2, 3, 4, 5$ ) was obtained by taking the initial concentration of phenol (the maximum concentration of phenol at each monitoring point) as the  $x$ -coordinate and the actual scale range of environmental damage as the  $y$ -coordinate. At the same time, in the curve series of the scale range of environmental damage, the corresponding point  $B_x$  ( $x = 1, 2, 3, 4, 5$ ) could be found where the  $x$ -coordinate was the initial concentration of phenol in the monitoring data. The  $y$ -coordinates of point  $A_x$  and point  $B_x$  were compared to compare the actual scale range of environmental damage with the simulated scale range of environmental damage, and the error of the curve series of the scale range of environmental damage was determined, so as to judge the scientificity of this quantitative method to confirm the scale range of environmental damage.

In the phenol pollution event in Jingle County, the calculation equation of the actual scale range ( $L_a$ ) of environmental damage is shown in Equation (1):

$$L_a = v \times t \quad (1)$$

In Equation (1),  $v$  is the average flow velocity of Fen River from the leakage point to each monitoring point, and  $t$  is the migration time of the phenol, which is the time required for the decrease of the concentration of phenol at the monitoring point from the maximum concentration ( $C_{\max}$ ) to the safe concentration ( $C_s$ ) when the phenol migrates to a monitoring point. The calculation results of  $L_a$  at each monitoring point are shown in Table 6.

According to  $L_a$ , a series of points ( $A_x$ ) could be obtained. By comparing a series of corresponding points ( $B_x$ ) in the curve series of the scale range of environmental damage with  $A_x$ , the error ( $E$ ) of the curve series of the scale range of environmental damage could be calculated. The calculation equation of  $E$  is shown in Equation (2), and the calculation results of  $E$  are shown in Table 7.

$$E = \frac{|L - L_a|}{L_a} \times 100\% \quad (2)$$

As can be seen from Table 7, the maximum value of  $E$  was 22.4% and the minimum value was 7.5%. The calculation results of  $E$  showed that the error of the curve series of the scale range of environmental damage was small and the curve was practical, which proved the quantitative method to determine the scale range of environmental damage had certain scientificity. In conclusion, the results of this study can lay the certain foundation for determining the scale range of environmental damage caused by sudden water pollution events and provide favorable technical support and practical experience, and may offer the basis for the related work of identifying the scale range of environmental damage.

## CONCLUSIONS

The purpose of this study was to propose a new method to determine the scale range of environmental damage in water pollution events, and verify the scientific nature of this method through an actual case. This has not been mentioned in previous studies. In this study, taking Fen River in Shanxi Province as an example, a computer simulation system was used to simulate the diffusion and migration process of phenol at different concentrations, so as to determine the curve series of the scale range of environmental damage caused by the simulated water pollution event. At the same time, taking the incident of water pollution

**Table 5** | The monitoring concentration of phenol in the event

| Name of monitoring station | Leakage time (h) | Monitoring concentration (mg/L) |
|----------------------------|------------------|---------------------------------|
| The leakage point          | 2                | 95.59                           |
|                            | 4                | 81.37                           |
|                            | 6                | 74.22                           |
|                            | 8                | 62.59                           |
|                            | 10               | 51.66                           |
|                            | 12               | 43.83                           |
|                            | 14               | 30.12                           |
|                            | 16               | 14.70                           |
|                            | 18               | 10.19                           |
|                            | 20               | 7.84                            |
|                            | 22               | 4.55                            |
|                            | 24               | 0.98                            |
|                            | 26–38            | 0.00                            |
| Hexi Village               | 2                | 0.00                            |
|                            | 4                | 49.68                           |
|                            | 6                | 71.19                           |
|                            | 8                | 62.56                           |
|                            | 10               | 50.11                           |
|                            | 12               | 39.37                           |
|                            | 14               | 30.90                           |
|                            | 16               | 27.46                           |
|                            | 18               | 21.82                           |
|                            | 20               | 16.33                           |
|                            | 22               | 12.69                           |
|                            | 24               | 9.07                            |
|                            | 26               | 5.51                            |
| Thunder Temple             | 28               | 2.57                            |
|                            | 30–42            | 0.00                            |
|                            | 2–4              | 0.00                            |
|                            | 6                | 15.88                           |
|                            | 8                | 28.45                           |
|                            | 10               | 37.09                           |
|                            | 12               | 32.66                           |
|                            | 14               | 26.31                           |
|                            | 16               | 20.18                           |
|                            | 18               | 14.05                           |
|                            | 20               | 10.26                           |
|                            | 22               | 6.13                            |
|                            | 24               | 3.58                            |
| Fen River Reservoir outlet | 26               | 1.14                            |
|                            | 28–40            | 0.00                            |
|                            | 2–10             | 0.00                            |
|                            | 12               | 13.68                           |
|                            | 14               | 25.79                           |
|                            | 16               | 32.14                           |
|                            | 18               | 25.80                           |
|                            | 20               | 18.54                           |
|                            | 22               | 12.91                           |
|                            | 24               | 7.33                            |
|                            | 26               | 2.24                            |
|                            | 28–40            | 0.00                            |
| Shanglan                   | 2–12             | 0.00                            |
|                            | 14               | 6.83                            |
|                            | 16               | 17.76                           |
|                            | 18               | 23.15                           |

(Continued.)

**Table 5** | Continued

| Name of monitoring station | Leakage time (h) | Monitoring concentration (mg/L) |
|----------------------------|------------------|---------------------------------|
| Wenna club                 | 20               | 18.69                           |
|                            | 22               | 12.26                           |
|                            | 24               | 8.48                            |
|                            | 26               | 3.52                            |
|                            | 28               | 1.06                            |
|                            | 30–42            | 0.00                            |
|                            | 2–16             | 0.00                            |
|                            | 18               | 3.96                            |
|                            | 20               | 8.33                            |
|                            | 22               | 11.09                           |
|                            | 24               | 8.23                            |
|                            | 26               | 5.77                            |
|                            | 28               | 2.61                            |
|                            | 30               | 0.58                            |
|                            | 32–44            | 0.00                            |

**Table 6** | The calculation table of  $L_a$  at each monitoring point

| Name of monitoring station   | $v$ (m/s) | $C_{\max}$ (mg/L) | $C_s$ (mg/L) | $t = t_s - t_{\max}$ (h) | $L_a$ (km) |
|------------------------------|-----------|-------------------|--------------|--------------------------|------------|
| 1-Hexi Village               | 2.9       | 71.19             | 0.00         | $24 = 30 - 6$            | 250.56     |
| 2-Thunder Temple             | 1.7       | 37.09             | 0.00         | $18 = 28 - 10$           | 110.16     |
| 3-Fen River Reservoir outlet | 1.6       | 32.14             | 0.00         | $12 = 28 - 16$           | 69.12      |
| 4-Shanglan                   | 1.1       | 23.15             | 0.00         | $12 = 30 - 18$           | 47.52      |
| 5-Wenna club                 | 0.8       | 11.09             | 0.00         | $10 = 32 - 22$           | 28.80      |

**Table 7** | The calculation table of  $E$ 

| Name of monitoring station   | $C_{\max}$ (mg/L) | $L_a$ (km) | $L$ (km) | $E$ (%) |
|------------------------------|-------------------|------------|----------|---------|
| 1-Hexi Village               | 71.19             | 250.56     | 231.79   | 7.5     |
| 2-Thunder Temple             | 37.09             | 110.16     | 85.63    | 22.3    |
| 3-Fen River Reservoir outlet | 32.14             | 69.12      | 57.22    | 17.2    |
| 4-Shanglan                   | 23.15             | 47.52      | 36.86    | 22.4    |
| 5-Wenna club                 | 11.09             | 28.80      | 23.09    | 19.8    |

caused by phenol leakage in Jingle County as an example, the actual scale range of environmental damage of the incident was obtained according to the monitoring data of phenol concentration, and the actual scale range of environmental damage was compared with the simulated scale range, so as to determine the error of the scale range of environmental damage. The results showed that the maximum error of the curve series of the scale range of environmental damage was 22.4%, and the minimum error was 7.5%, which indicated that the error of the scale range of environmental damage was small, and proved that this method of quantitatively determining the scale range of environmental damage had certain scientific nature.

The advantage of this study was to propose a new method using computer simulation software to determine the scale range of environmental damage in water pollution events, and this proposed method was proved to be scientific by a practical case. Meanwhile, the disadvantage of the study was that the simulation results were not accurate enough due to only one value being able to be assigned to each parameter in the simulation process, and the impact of the changes of those parameters on simulation results could not be reflected. Therefore, the simulation system in this study should be further optimized and improved in following studies. For example, an ensemble empirical mode decomposition (EEMD) is used to realize the diversification of parameter values (Alizadeh *et al.* 2019; Roushangar & Alizadeh 2019).

## ACKNOWLEDGEMENTS

We are very grateful to Taiyuan University of Technology, Taiyuan, China, Chongzheng Zhao, Lin Lv for their kind cooperation and discussion at different stages of this study and their timely efforts in supplying the data and information needed for this study.

## CONFLICT OF INTEREST

On behalf of the author, the corresponding author states that there is no conflict of interest.

## DATA AVAILABILITY STATEMENT

All relevant data are included in the paper or its Supplementary Information.

## REFERENCES

- Alizadeh, F., Roushangar, K. & Adamowski, J. 2019 Investigating monthly precipitation variability using a multiscale approach based on ensemble empirical mode decomposition. *Paddy Water Environ.* **17** (4), 741–759.
- Ani, E. C., Cristea, V. M. & Agachi, P. S. 2012 Mathematical models to support pollution counteraction in case of accidents. *Environ. Eng. Manage. J.* **11** (1), 13–20.
- Belayutham, S., González, V. A. & Yiu, T. W. 2016 The dynamics of proximal and distal factors in construction site water pollution. *J. Cleaner Prod.* **113**, 54–65.
- Ding, X. W., Wang, S. Y., Jiang, G. H. & Huang, G. H. 2017 A simulation program on change trend of pollutant concentration under water pollution accidents and its application in Heshangshan drinking water source area. *J. Cleaner Prod.* **167** (5), 326–336.
- Dong, L., Liu, J., Du, X., Dai, C. & Liu, R. 2017 Simulation-based risk analysis of water pollution accidents combining multi-stressors and multi-receptors in a coastal watershed. *Ecol. Indic.* **92**, 161–170.
- He, Q., Peng, S., Zhai, J. & Xiao, H. W. 2011 Development and application of a water pollution emergency response system for the Three Gorges Reservoir in the Yangtze River, China. *J. Environ. Sci.* **23** (4), 595–600.
- Li, J. F., Zhang, B., Liu, M. & Wang, Y. 2009 Numerical simulation of the large-scale malignant environmental pollution incident. *Process Saf. Environ.* **87** (4), 232–244.
- Liu, R. Z., Borthwick, A. G. L., Lan, D. D. & Zeng, W. H. 2013 Environmental risk mapping of accidental pollution and its zonal prevention in a city. *Process Saf. Environ.* **91** (5), 397–404.
- Ministry of Environmental Protection (China MEP) 2015–2019 *China Environment Bulletin 2004–2010*. China MEP, Beijing, China.
- Peng, J., Song, Y., Yuan, P., Xiao, S. & Han, L. 2013 A novel identification method of the environmental risk sources for surface water pollution accidents in chemical industrial parks. *J. Environ. Sci.* **25** (7), 1441–1449.
- Pulido-Velazquez, M. & Ward, F. A. 2017 Comparison of water management institutions and approaches in the United States and Europe – what can we learn from each other. In: *Competition for Water Resources: Experience and Management Approaches in the US and Europe* (J. R. Ziolkowska & J. M. Peterson, eds), Elsevier, Amsterdam, The Netherlands, pp. 423–441.
- Qu, J. H., Meng, X. L. & You, H. 2016 Multi-stage ranking of emergency technology alternatives for water source pollution accidents using a fuzzy group decision making tool. *J. Hazard. Mater.* **310**, 68–81.
- Ren, L. F., Chen, R., Zhang, X. F., Shao, J. H. & He, Y. L. 2017 Phenol biodegradation and microbial community dynamics in extractive membrane bioreactor (EMBR) for phenol-laden saline wastewater. *Bioresour. Technol.* **244** (1), 1121–1128.
- Roushangar, K. & Alizadeh, F. 2019 Scenario-based prediction of short-term river stage–discharge process using wavelet-EEMD-based relevance vector machine. *J. Hydroinform.* **21** (1), 56–76.
- Rui, Y., Shen, D., Khalid, S., Yang, Z. & Wang, J. 2015 GIS-based emergency response system for sudden water pollution accidents. *Phys. Chem. Earth (A/B/C)* **79–82**, 115–121.
- Tang, C., Yi, Y., Yang, Z. & Cheng, X. 2014 Water pollution risk simulation and prediction in the main canal of the South-to-North Water Transfer Project. *J. Hydrol.* **519**, 2111–2120.
- Tao, Y., Ren, H. T. & Xia, J. X. 2013 Investigation on disposal effect of different countermeasure of sudden water pollution accident. *J. Basic Sci. Eng.* **21** (2), 203–213.
- Wang, Q. G., Zhao, X. H., Wu, W. J., Yang, M. S., Ma, Q. & Liu, K. 2008 Advection–diffusion models establishment of water-pollution accident in middle and lower reaches of Hangjiang River. *Adv. Water Sci.* **19** (4), 500–504.
- Yang, W., Song, J., Higano, Y. & Tang, J. 2015 Exploration and assessment of optimal policy combination for total water pollution control with a dynamic simulation model. *J. Cleaner Prod.* **102**, 342–352.
- Yang, L. K., Peng, S., Zhao, X. H. & Li, X. 2017 Development of a two-dimensional eutrophication model in an urban lake (China) and the application of uncertainty analysis. *Ecol. Modell.* **345**, 63–74.

First received 19 October 2021; accepted in revised form 22 December 2021. Available online 21 January 2022
